# Supplementary material
Source: PubMed Central journal article supplement (PMC8929374)

**Disclosure Purpose:** 22-01933

### Summary of Interests

I do not have any interests to disclose at this time.

### Additional Questions:

- Are there other relationships or activities that readers could perceive to have influenced, or that give the appearance of potentially influencing, what you wrote in the submitted work?**  
No.
- What is the manuscript title?**  
Efficacy of Antiviral Agents Against the SARS-CoV-2 Omicron BA.2 Variant
- Are you the corresponding author?**  
No.

### Certification

I certify that the information provided in this disclosure is complete and accurate.

**Disclosure Purpose:** 22-01933

**Summary of Interests**

I do not have any interests to disclose at this time.

**Additional Questions:**

- Are there other relationships or activities that readers could perceive to have influenced, or that give the appearance of potentially influencing, what you wrote in the submitted work?**  
No.
- What is the manuscript title?**  
Efficacy of Antiviral Agents Against the SARS-CoV-2 Omicron BA.2 Variant
- Are you the corresponding author?**  
No.

**Certification**

I certify that the information provided in this disclosure is complete and accurate.

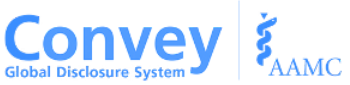

**Disclosure Purpose:** 22-01933

## Summary of Interests

| Company or Organization                                                                                                   |                  |                                                                                |
|---------------------------------------------------------------------------------------------------------------------------|------------------|--------------------------------------------------------------------------------|
| Entity                                                                                                                    | Type             | Interest Held By                                                               |
| <a href="#">Ministry of Health, Labour and Welfare</a>                                                                    | Grant / Contract | Self                                                                           |
| <i>Recipient Name:</i> Hideki Hasegawa<br><i>Grant / Contract Description:</i> 20HA2007<br><i>Additional Information:</i> |                  | <i>Recipient Type:</i> Individual<br><i>Grant / Contract Purpose:</i> Research |

## Additional Questions:

- Are there other relationships or activities that readers could perceive to have influenced, or that give the appearance of potentially influencing, what you wrote in the submitted work?**  
No.
- What is the manuscript title?**  
Efficacy of Antibodies and Antivirals Against a SARS-CoV-2 Omicron Variant.
- Are you the corresponding author?**  
No.

## Certification

I certify that the information provided in this disclosure is complete and accurate.

**Disclosure Purpose:** 22-01933

**Summary of Interests**

I do not have any interests to disclose at this time.

**Additional Questions:**

- 1. **Are there other relationships or activities that readers could perceive to have influenced, or that give the appearance of potentially influencing, what you wrote in the submitted work?**  
No.
- 2. **What is the manuscript title?**  
Efficacy of Antiviral Agents against the SARS-CoV-2 Omicron BA.2 Variant
- 3. **Are you the corresponding author?**  
No.

**Certification**

I certify that the information provided in this disclosure is complete and accurate.



**Disclosure Purpose:** 22-01933

### Summary of Interests

I do not have any interests to disclose at this time.

### Additional Questions:

- Are there other relationships or activities that readers could perceive to have influenced, or that give the appearance of potentially influencing, what you wrote in the submitted work?**  
No.
- What is the manuscript title?**  
Efficacy of Antibodies and Antivirals Against a SARS-CoV-2 Omicron Variant
- Are you the corresponding author?**  
No.

### Certification

I certify that the information provided in this disclosure is complete and accurate.

**Disclosure Purpose:** 22-01933

### Summary of Interests

I do not have any interests to disclose at this time.

### Additional Questions:

- Are there other relationships or activities that readers could perceive to have influenced, or that give the appearance of potentially influencing, what you wrote in the submitted work?**  
No.
- What is the manuscript title?**  
Efficacy of Antiviral Agents Against the SARS-CoV-2 Omicron BA.2 Variant
- Are you the corresponding author?**  
No.

### Certification

I certify that the information provided in this disclosure is complete and accurate.

Disclosure Purpose: 22-01933

## Summary of Interests

### Company or Organization

| Entity                                                                                                                                                     | Type             | Interest Held By |
|------------------------------------------------------------------------------------------------------------------------------------------------------------|------------------|------------------|
| <a href="#">Daiichi Sankyo Company LTD</a>                                                                                                                 | Grant / Contract | Self             |
| <i>Recipient Name:</i> Yoshihiro Kawaoka<br><i>Grant / Contract Description:</i> Development of influenza vaccines<br><i>Additional Information:</i>       |                  |                  |
| <a href="#">fujirebio</a>                                                                                                                                  | Grant / Contract | Self             |
| <i>Recipient Name:</i> Yoshihiro Kawaoka<br><i>Grant / Contract Description:</i><br><i>Additional Information:</i>                                         |                  |                  |
| <a href="#">Japan Agency for Medical Research and Development</a>                                                                                          | Grant / Contract | Self             |
| <i>Recipient Name:</i> Yoshihiro Kawaoka<br><i>Grant / Contract Description:</i> JP20nk0101632<br><i>Additional Information:</i>                           |                  |                  |
| <a href="#">Japan Agency for Medical Research and Development</a>                                                                                          | Grant / Contract | Self             |
| <i>Recipient Name:</i> Yoshihiro Kawaoka<br><i>Grant / Contract Description:</i> JP21fk0108615<br><i>Additional Information:</i>                           |                  |                  |
| <a href="#">Japan Agency for Medical Research and Development</a>                                                                                          | Grant / Contract | Self             |
| <i>Recipient Name:</i> Yoshihiro Kawaoka<br><i>Grant / Contract Description:</i> JP21fk0108104<br><i>Additional Information:</i>                           |                  |                  |
| <a href="#">Japan Agency for Medical Research and Development</a>                                                                                          | Grant / Contract | Self             |
| <i>Recipient Name:</i> Yoshihiro Kawaoka<br><i>Grant / Contract Description:</i> JP20fk0108412<br><i>Additional Information:</i>                           |                  |                  |
| <a href="#">Japan Agency for Medical Research and Development</a>                                                                                          | Grant / Contract | Self             |
| <i>Recipient Name:</i> Yoshihiro Kawaoka<br><i>Grant / Contract Description:</i> JP21wm0125002<br><i>Additional Information:</i>                           |                  |                  |
| <a href="#">KM Biologics</a>                                                                                                                               | Grant / Contract | Self             |
| <i>Recipient Name:</i> Yoshihiro Kawaoka<br><i>Grant / Contract Description:</i> Development of novel influenza vaccines<br><i>Additional Information:</i> |                  |                  |
| <a href="#">Kyoritsu Seiyaku</a>                                                                                                                           | Grant / Contract | Self             |
| <i>Recipient Name:</i> Yoshihiro Kawaoka<br><i>Grant / Contract Description:</i> Development of adjuvants<br><i>Additional Information:</i>                |                  |                  |
| <a href="#">Ministry of Health, Labour and Welfare</a>                                                                                                     | Grant / Contract | Self             |
| <i>Recipient Name:</i> Yoshihiro Kawaoka<br><i>Grant / Contract Description:</i> 20HA2007<br><i>Additional Information:</i>                                |                  |                  |
| <a href="#">Otsuka Pharmaceutical Co., Ltd.</a>                                                                                                            | Grant / Contract | Self             |
| <i>Recipient Name:</i> Yoshihiro Kawaoka<br><i>Grant / Contract Description:</i> Evaluation of enteric bacteria<br><i>Additional Information:</i>          |                  |                  |
| <a href="#">Shinya Corporation</a>                                                                                                                         | Grant / Contract | Self             |

|                                                                                                                                                             |                                                                                |
|-------------------------------------------------------------------------------------------------------------------------------------------------------------|--------------------------------------------------------------------------------|
| <i>Recipient Name:</i> Yoshihiro Kawaoka<br><i>Grant / Contract Description:</i> Development of vaccine device<br><i>Additional Information:</i>            | <i>Recipient Type:</i> Individual<br><i>Grant / Contract Purpose:</i> Research |
| shinya corporation                                                                                                                                          | Grant / Contract Self                                                          |
| <i>Recipient Name:</i> Yoshihiro Kawaoka<br><i>Grant / Contract Description:</i><br><i>Additional Information:</i>                                          | <i>Recipient Type:</i> Individual<br><i>Grant / Contract Purpose:</i> Research |
| Shionogi                                                                                                                                                    | Grant / Contract Self                                                          |
| <i>Recipient Name:</i> Yoshihiro Kawaoka<br><i>Grant / Contract Description:</i> Evaluation of influenza drugs<br><i>Additional Information:</i>            | <i>Recipient Type:</i> Individual<br><i>Grant / Contract Purpose:</i> Research |
| Tauns Laboratories                                                                                                                                          | Grant / Contract Self                                                          |
| <i>Recipient Name:</i> Yoshihiro Kawaoka<br><i>Grant / Contract Description:</i> Development of influenza diagnostic kits<br><i>Additional Information:</i> | <i>Recipient Type:</i> Individual<br><i>Grant / Contract Purpose:</i> Research |
| Toyama Chemical                                                                                                                                             | Grant / Contract Self                                                          |
| <i>Recipient Name:</i> Yoshihiro Kawaoka<br><i>Grant / Contract Description:</i> Evaluation of influenza drugs<br><i>Additional Information:</i>            | <i>Recipient Type:</i> Individual<br><i>Grant / Contract Purpose:</i> Research |
| US NIH                                                                                                                                                      | Grant / Contract Self                                                          |
| <i>Recipient Name:</i> Yoshihiro Kawaoka<br><i>Grant / Contract Description:</i> 75N93021C00014<br><i>Additional Information:</i>                           | <i>Recipient Type:</i> Individual<br><i>Grant / Contract Purpose:</i> Research |
| US NIH                                                                                                                                                      | Grant / Contract Self                                                          |
| <i>Recipient Name:</i> Yoshihiro Kawaoka<br><i>Grant / Contract Description:</i> HHSN272201400008C<br><i>Additional Information:</i>                        | <i>Recipient Type:</i> Individual<br><i>Grant / Contract Purpose:</i> Research |

### Intellectual Property

| Type                                                                                                                                                                           | Is Licensed | Interest Held By                                                                                       |      |                |  |  |  |  |
|--------------------------------------------------------------------------------------------------------------------------------------------------------------------------------|-------------|--------------------------------------------------------------------------------------------------------|------|----------------|--|--|--|--|
| Patent - Influenza reverse genetics                                                                                                                                            | Yes         | Self                                                                                                   |      |                |  |  |  |  |
| <i>Description:</i> Influenza reverse genetics<br><i>Patent Status:</i> Issued<br><i>Filing Jurisdiction:</i><br><i>Licensees:</i>                                             |             | <i>Patent Number:</i> US 20160137987 A1<br><i>Patent Holder:</i><br><br><i>Additional Information:</i> |      |                |  |  |  |  |
| <table border="1"> <thead> <tr> <th>Licensee</th> <th>Title</th> <th>Date</th> </tr> </thead> <tbody> <tr> <td>MedImmune, LLC</td> <td></td> <td></td> </tr> </tbody> </table> | Licensee    | Title                                                                                                  | Date | MedImmune, LLC |  |  |  |  |
| Licensee                                                                                                                                                                       | Title       | Date                                                                                                   |      |                |  |  |  |  |
| MedImmune, LLC                                                                                                                                                                 |             |                                                                                                        |      |                |  |  |  |  |

### Additional Questions:

- Are there other relationships or activities that readers could perceive to have influenced, or that give the appearance of potentially influencing, what you wrote in the submitted work?  
No.
- What is the manuscript title?  
Efficacy of antibodies and antivirals against the SARS-CoV-2 Omicron BA.2 variant
- Are you the corresponding author?  
Yes.
  - Please list the other authors' names here.  
Emi Takashita, Noriko Kinoshita, Seiya Yamayoshi, Yuko Sakai-Tagawa, Seiichiro Fujisaki, Mutsumi Ito, Kiyoko Iwatsuki-Horimoto, Peter Halfmann, Shinji Watanabe, Kenji Maeda, Masaki Imai, Hiroaki Mitsuya, Norio Ohmagari, Makoto Takeda, Hideki Hasegawa, Yoshihiro Kawaoka

### Certification

I certify that the information provided in this disclosure is complete and accurate.





**Disclosure Purpose:** 22-01933

### Summary of Interests

I do not have any interests to disclose at this time.

### Additional Questions:

- Are there other relationships or activities that readers could perceive to have influenced, or that give the appearance of potentially influencing, what you wrote in the submitted work?**  
No.
- What is the manuscript title?**  
Efficacy of Antiviral Agents Against the SARS-CoV-2 Omicron BA.2 Variant
- Are you the corresponding author?**  
No.

### Certification

I certify that the information provided in this disclosure is complete and accurate.

**Disclosure Purpose:** 22-01933

Summary of Interests

I do not have any interests to disclose at this time.

Additional Questions:

- 1. **Are there other relationships or activities that readers could perceive to have influenced, or that give the appearance of potentially influencing, what you wrote in the submitted work?**  
No.
- 2. **What is the manuscript title?**  
Efficacy of Antibodies and Antivirals Against a SARS-CoV-2 Omicron Variant
- 3. **Are you the corresponding author?**  
No.

Certification

I certify that the information provided in this disclosure is complete and accurate.



**Disclosure Purpose:** 22-01933

### Summary of Interests

I do not have any interests to disclose at this time.

### Additional Questions:

- Are there other relationships or activities that readers could perceive to have influenced, or that give the appearance of potentially influencing, what you wrote in the submitted work?**  
No.
- What is the manuscript title?**  
Efficacy of Antibodies and Antivirals Against a SARS-CoV-2 Omicron Variant
- Are you the corresponding author?**  
No.

### Certification

I certify that the information provided in this disclosure is complete and accurate.



**Disclosure Purpose:** 22-01933

### Summary of Interests

I do not have any interests to disclose at this time.

### Additional Questions:

- Are there other relationships or activities that readers could perceive to have influenced, or that give the appearance of potentially influencing, what you wrote in the submitted work?**  
No.
- What is the manuscript title?**  
Efficacy of Antiviral Agents Against the SARS-CoV-2 Omicron BA.2 Variant
- Are you the corresponding author?**  
No.

### Certification

I certify that the information provided in this disclosure is complete and accurate.



**Disclosure Purpose:** 22-01933

**Summary of Interests**

I do not have any interests to disclose at this time.

**Additional Questions:**

- 1. Are there other relationships or activities that readers could perceive to have influenced, or that give the appearance of potentially influencing, what you wrote in the submitted work?**  
No.
- 2. What is the manuscript title?**  
Efficacy of Antibodies and Antivirals Against a SARS-CoV-2 Omicron Variant
- 3. Are you the corresponding author?**  
No.

**Certification**

I certify that the information provided in this disclosure is complete and accurate.

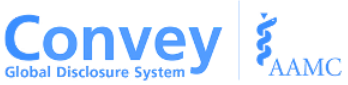

**Disclosure Purpose:** 22-01933

**Summary of Interests**

I do not have any interests to disclose at this time.

**Additional Questions:**

- 1. **Are there other relationships or activities that readers could perceive to have influenced, or that give the appearance of potentially influencing, what you wrote in the submitted work?**  
No.
- 2. **What is the manuscript title?**  
Efficacy of Antiviral Agents Against the SARS-CoV-2 Omicron BA.2 Variant
- 3. **Are you the corresponding author?**  
No.

**Certification**

I certify that the information provided in this disclosure is complete and accurate.



**Disclosure Purpose:** 22-01933

### Summary of Interests

I do not have any interests to disclose at this time.

### Additional Questions:

- Are there other relationships or activities that readers could perceive to have influenced, or that give the appearance of potentially influencing, what you wrote in the submitted work?**  
No.
- What is the manuscript title?**  
Efficacy of Antibodies and Antivirals Against a SARS-CoV-2 Omicron Variant
- Are you the corresponding author?**  
No.

### Certification

I certify that the information provided in this disclosure is complete and accurate.



**Disclosure Purpose:** 22-01933

## Summary of Interests

| Company or Organization                                                                                                                                           |                  |                                                                                                                                |
|-------------------------------------------------------------------------------------------------------------------------------------------------------------------|------------------|--------------------------------------------------------------------------------------------------------------------------------|
| Entity                                                                                                                                                            | Type             | Interest Held By                                                                                                               |
| <a href="#">Japan Agency for Medical Research and Development</a>                                                                                                 | Grant / Contract | Self                                                                                                                           |
| <i>Recipient Name:</i> Shinji Watanabe<br><i>Grant / Contract Description:</i> a Research Program on Emerging and Re-emerging Infectious Disease (#JP21fk0108104) |                  | <i>Recipient Type:</i> Individual<br><i>Grant / Contract Purpose:</i> Research<br><i>Additional Information:</i> JP21fk0108104 |

## Additional Questions:

- Are there other relationships or activities that readers could perceive to have influenced, or that give the appearance of potentially influencing, what you wrote in the submitted work?**  
No.
- What is the manuscript title?**  
Efficacy of antiviral agents against the SARS-CoV-2 Omicron BA.2 variant
- Are you the corresponding author?**  
No.

## Certification

I certify that the information provided in this disclosure is complete and accurate.

**Disclosure Purpose:** 22-01933

Summary of Interests

I do not have any interests to disclose at this time.

Additional Questions:

- 1. **Are there other relationships or activities that readers could perceive to have influenced, or that give the appearance of potentially influencing, what you wrote in the submitted work?**  
No.
- 2. **What is the manuscript title?**  
Efficacy of Antiviral Agents against the SARS-CoV-2 Omicron BA.2 Variant
- 3. **Are you the corresponding author?**  
No.

Certification

I certify that the information provided in this disclosure is complete and accurate.



Supplement: NEJMc2201933_disclosures.pdf [file NEJMc2201933_disclosures.pdf]
