# Supplementary material
Source: PubMed Central journal article supplement (PMC8929374)
Supplement: NEJMc2201933_appendix.pdf [file NEJMc2201933_appendix.pdf]

## Supplementary Appendix

Supplement to: Takashita E, Kinoshita N, Yamayoshi S, et al. Efficacy of antiviral agents against the SARS-CoV-2 omicron subvariant BA.2. *N Engl J Med*. DOI: 10.1056/NEJMc2201933

This appendix has been provided by the authors to give readers additional information about the work.

**Efficacy of antiviral agents against the SARS-CoV-2 Omicron BA.2 variant**

**Supplementary Appendix**

**Table of Contents**

**List of investigators ..... 2**  
**Supplementary Materials ..... 3**  
**Supplementary Methods ..... 5**  
**Acknowledgements ..... 6**  
**Supplementary Tables**  
**Table S1 ..... 7**  
**Table S2 ..... 8**  
**Supplementary References ..... 9**

**List of investigators:**

Emi Takashita, Ph.D.

National Institute of Infectious Diseases, Tokyo, Japan

Noriko Kinoshita, M.D.

National Center for Global Health and Medicine, Tokyo, Japan

Seiya Yamayoshi, D.V.M., Ph.D.

Yuko Sakai-Tagawa, Ph.D.

University of Tokyo, Tokyo, Japan

Seiichiro Fujisaki, Ph.D.

National Institute of Infectious Diseases, Tokyo, Japan

Mutsumi Ito, D.V.M.

Kiyoko Iwatsuki-Horimoto, D.V.M., Ph.D.

University of Tokyo, Tokyo, Japan

Peter Halfmann, Ph.D.

University of Wisconsin-Madison, Madison, USA

Shinji Watanabe, D.V.M., Ph.D.

National Institute of Infectious Diseases, Tokyo, Japan

Kenji Maeda, M.D., Ph.D.

National Center for Global Health and Medicine, Tokyo, Japan

Masaki Imai, D.V.M., Ph.D.

University of Tokyo, Tokyo, Japan

Hiroaki Mitsuya, M.D., Ph.D.

Norio Ohmagari, M.D., Ph.D.

National Center for Global Health and Medicine, Tokyo, Japan

Makoto Takeda, M.D., Ph.D.

Hideki Hasegawa, M.D., Ph.D.

National Institute of Infectious Diseases, Tokyo, Japan

Yoshihiro Kawaoka, D.V.M., Ph.D.

University of Tokyo, Tokyo, Japan

## **Supplementary Materials**

### **Cells.**

VeroE6/TMPRSS2 (JCRB 1819)<sup>1</sup> cells were propagated in the presence of 1 mg/ml geneticin (G418; Invivogen) and 5 µg/ml plasmocin prophylactic (Invivogen) in Dulbecco's modified Eagle's medium (DMEM) containing 10% Fetal Calf Serum (FCS), and maintained at 37 °C with 5% CO<sub>2</sub>. Chinese hamster ovary (CHO) cells were maintained in DMEM containing 10% FCS and antibiotics at 37 °C with 5% CO<sub>2</sub>. Expi293F cells (Thermo Fisher Scientific) were maintained in Expi293 expression medium (Thermo Fisher Scientific) at 37 °C under 8% CO<sub>2</sub>. The cells were regularly tested for mycoplasma contamination by using PCR, and confirmed to be mycoplasma-free.

### **Clinical specimens.**

After informed consent was obtained, specimens were collected from individuals with SARS-CoV-2 infection. The research protocol was approved by the Research Ethics Review Committee of the Institute of Medical Science of the University of Tokyo (approval number 2019–71–0201).

### **Viruses.**

hCoV-19/Japan/UT-NCD1288-2N/2022 (Omicron/BA.2; NCD1288), hCoV-19/Japan/NC928-2N/2021 (Omicron/BA.1; NC928)<sup>2</sup>, hCoV-19/Japan/NC929-1N/2021 (Omicron/BA.1.1; NC929)<sup>3</sup>, SARS-CoV-2/UT-NC002-1T/Human/2020/Tokyo (NC002), SARS-CoV-2/UT-HP127-1Nf/Human/2021/Tokyo (Alpha; HP127), hCoV-19/USA/MD-HP01542/2021 (Beta; HP01542), hCoV-19/Japan/TY7-503/2021 (Gamma; TY7-503), and hCoV-19/USA/WI-UW-5250/2021 (Delta; UW5250)] were propagated in VeroE6/TMPRSS2 cells in VP-SFM (Thermo Fisher Scientific). The sequence of hCoV-19/Japan/UT-NCD1288-2N/2022 (Omicron/BA.2; NCD1288) was deposited in the Global Initiative on Sharing All Influenza Data (GISAID) database with Accession ID: EPI\_ISL\_9595604.

All experiments with SARS-CoV-2 were performed in enhanced biosafety level 3 (BSL3) containment laboratories at the University of Tokyo and the National Institute of Infectious Diseases, Japan, which are approved for such use by the Ministry of Agriculture, Forestry and Fisheries, Japan.

### **Antibodies.**

Amino acid sequences for the variable region of the heavy and light chains of the following human monoclonal antibodies against the S protein were used for gene synthesis: clones tixagevimab (COV2-2196/AZD8895; GenBank accession numbers QLI33947 and QLI33948), casirivimab (REGN10933; PDB accession numbers 6XDG\_B and 6XDG\_D), cilgavimab (COV2-2130/AZD1061; GenBank accession numbers QKY76296 and QKY75909), imdevimab (REGN10987; PDB accession numbers 6XDG\_A and 6XDG\_A), and S309 (PDB accession numbers 6WS6\_A and 6WS6\_F). An artificial signal sequence and the constant gamma heavy (IgG1, UniProtKB/Swiss-Prot accession number P01857) and kappa (UniProtKB/Swiss-Prot accession number P01834) or lambda (UniProtKB/Swiss-Prot accession number P0DOY2) light chain coding sequences were added before and after each variable

region. Codon usage was optimized for expression in CHO cells. The synthesized genes were cloned into a plasmid for protein expression and transfected into CHO cells. Cell culture media were harvested after incubation for 10–14 days at 37 °C. Monoclonal antibodies were purified by using MabSelect SuRe LX (Cytiva) or a protein A column. Purity was confirmed by SDS-PAGE and/or HPLC before use. The reactivities of these antibodies against SARS-CoV-2, including the Alpha, Beta, Delta, Gamma, and Omicron variants, have been tested previously<sup>2</sup>.

#### **Antiviral compounds.**

Active components of remdesivir and molnupiravir (i.e., GS-441524 and EIDD-1931), and nirmatrelvir (PF-07321332) were purchased from MedChemExpress. All compounds were dissolved in dimethyl sulfoxide.

## **Supplementary Methods**

### **Whole genome sequencing.**

Viral RNA was extracted by using a QIAamp Viral RNA Mini Kit (QIAGEN). The whole genome of SARS-CoV-2 was amplified by using a modified ARTIC network protocol in which some primers were replaced or added<sup>4,5</sup>. Briefly, viral cDNA was synthesized from the extracted RNA by using a LunarScript RT SuperMix Kit (New England BioLabs). The DNA was amplified by multiplexed PCR in two pools using the ARTIC-N1 primers v4 or v5<sup>6</sup> and the Q5 Hot Start DNA polymerase (New England BioLabs). The DNA libraries for Illumina NGS were prepared from pooled amplicons by using a QIAseq FX DNA Library Kit (QIAGEN) and were then analyzed by using the iSeq 100 System (Illumina). The reads were assembled by the CLC Genomics Workbench (version 21, Qiagen) with the Wuhan/Hu-1/2019 sequence (GenBank accession no. MN908947) as a reference. The sequence of hCoV-19/Japan/UT-NCD1288-2N/2022 (Omicron/BA.2; NCD1288) was deposited in the Global Initiative on Sharing All Influenza Data (GISAID) database<sup>7</sup> with Accession ID: EPI\_ISL\_9595604.

### **Focus reduction neutralization test (FRNT).**

Neutralization activities of SARS-CoV-2 were determined by using a focus reduction neutralization assay as previously described.<sup>8</sup> Serial dilutions of monoclonal antibodies (starting concentration, 50,000 ng/ml) were mixed with 1000 focus-forming units (FFU) of virus/well and incubated for 1 h at 37 °C. The antibody-virus mixture was inoculated on VeroE6/TMPRSS2 cells in 96-well plates in duplicate and incubated for 1 h at 37 °C. An equal volume of 1.2% Avicel RC-581 (DuPont Nutrition USA) in culture medium was added to each well. The cells were incubated for 24 h at 37 °C and then fixed with formalin. After the formalin was removed, the cells were immunostained with a mouse monoclonal antibody against SARS-CoV-1/2 nucleoprotein [clone 1C7C7 (Sigma-Aldrich)], followed by a horseradish peroxidase-labeled goat anti-mouse immunoglobulin (SeraCare Life Sciences). The infected cells were stained with TrueBlue Substrate (SeraCare Life Sciences) and then washed with distilled water. After cell drying, the focus numbers were quantified by using an ImmunoSpot S6 Analyzer, ImmunoCapture software, and BioSpot software (Cellular Technology). The results are expressed as the 50% focus reduction neutralization titer (FRNT<sub>50</sub>). The FRNT<sub>50</sub> values were calculated by using GraphPad Prism (GraphPad Software).

### **Inhibitory effect of compounds against SARS-CoV-2 *in vitro*.**

Antiviral susceptibilities of SARS-CoV-2 were determined by applying a focus reduction assay as previously reported for influenza virus.<sup>9</sup> VeroE6/TMPRSS2 cells in 96-well plates were infected with 1000 FFU of virus/well. Virus adsorption was carried out for 1 h at 37 °C and then an equal volume of 1.2% Avicel RC-581 (DuPont Nutrition USA) in culture medium containing serial dilutions of antiviral compounds was added to each well in triplicate. The cells were incubated for 24 h at 37 °C and then fixed with formalin. After the formalin was removed, immunostaining was performed as described for the FRNT. The results are expressed as the 50% inhibitory concentration (IC<sub>50</sub>). The IC<sub>50</sub> values were calculated by using GraphPad Prism (GraphPad Software).

## **Acknowledgements**

We thank Susan Watson for scientific editing. We thank Mehul Suthar for growing SARS-CoV-2. We also thank Hiroko Morita, Hideka Miura, and Shiho Nagata for technical assistance. This work was supported by a Research Program on Emerging and Re-emerging Infectious Diseases (JP20fk0108412, JP21fk0108615, and JP21fk0108104), a Project Promoting Support for Drug Discovery (JP20nk0101632), the Japan Program for Infectious Diseases Research and Infrastructure (JP21wm0125002) from the Japan Agency for Medical Research and Development (AMED), the National Institutes of Allergy and Infectious Diseases Center for Research on Influenza Pathogenesis (HHSN272201400008C), the Center for Research on Influenza Pathogenesis and Transmission (CRIPT) (75N93021C00014), and a Grant-in-Aid for Emerging and Reemerging Infectious Diseases from the Ministry of Health, Labour and Welfare, Japan (20HA2007).

**Table S1. Amino Acid Substitutions in the hCoV-19/Japan/UT-NCD1288-2N/2022 stock virus used in this study.\***

| Gene           | hCoV-19/Japan/UT-NCD1288-2N/2022                                                                                                                                                                                                                                                                                                                       |
|----------------|--------------------------------------------------------------------------------------------------------------------------------------------------------------------------------------------------------------------------------------------------------------------------------------------------------------------------------------------------------|
| ORF1a          | Ser135Arg, Thr842Ile, Gly1307Ser, Leu3027Phe, Thr3090Ile, Leu3201Phe, Thr3255Ile, Pro3395His, Ser3675del, Gly3676del, Phe3677del, Phe3753Val(20%), Leu4391Phe(19%)                                                                                                                                                                                     |
| ORF1b          | Pro314Leu, Gly662Val, Ser959Pro, Pro1161Ser(27%), Arg1315Cys, Ile1566Val, Thr2163Ile, Ala2513Val(18%)                                                                                                                                                                                                                                                  |
| S <sup>†</sup> | Thr19Ile, Leu24del, Pro25del, Pro26del, Ala27Ser, Gly142Asp, Val213Gly, <b>Gly339Asp, Ser371Phe, Ser373Pro, Ser375Phe, Thr376Ala, Asp405Asn, Arg408Ser, Lys417Asn, Asn440Lys, Ser477Asn, Thr478Lys, Glu484Ala, Gln493Arg, Gln498Arg, Asn501Tyr, Tyr505His</b> , Asp614Gly, His655Tyr, Asn679Lys, Pro681His, Asn764Lys, Asp796Tyr, Gln954His, Asn969Lys |
| ORF3a          | Thr223Ile                                                                                                                                                                                                                                                                                                                                              |
| E              | Thr9Ile                                                                                                                                                                                                                                                                                                                                                |
| M              | Gln19Glu, Ala63Thr                                                                                                                                                                                                                                                                                                                                     |
| ORF6           | Asp61Leu                                                                                                                                                                                                                                                                                                                                               |
| ORF9b          | Pro10Ser, Glu27del, Asn28del, Ala29del                                                                                                                                                                                                                                                                                                                 |
| N              | Pro13Leu, Glu31del, Arg32del, Ser33del, Arg203Lys, Gly204Arg, Ser413Arg                                                                                                                                                                                                                                                                                |

\*Substitutions based on a comparison with the Wuhan/Hu-1/2019 sequence.

<sup>†</sup>Substitutions in the Receptor-Binding Domain of S are indicated in boldface type.



**Table S2. Efficacy of Monoclonal Antibodies and Antiviral Drugs against SARS-CoV-2 Variants in Vitro.\***

| Monoclonal Antibody or Antiviral Drug                          | SARS-CoV-2/UT-NC002-1T/Human/2020/Tokyo (Ancestral strain/A) | SARS-CoV-2 Variant                                       |                                            |                                        |                                               |                                            |                                              |                                                 |
|----------------------------------------------------------------|--------------------------------------------------------------|----------------------------------------------------------|--------------------------------------------|----------------------------------------|-----------------------------------------------|--------------------------------------------|----------------------------------------------|-------------------------------------------------|
|                                                                |                                                              | SARS-CoV-2/UT-HP127-1Nf/Human/2021/Tokyo (Alpha/B.1.1.7) | hCoV-19/USA/MD-HP01542/2021 (Beta/B.1.351) | hCoV-19/Japan/TY7-503/2021 (Gamma/P.1) | hCoV-19/USA/WI-UW-5250/2021 (Delta/B.1.617.2) | hCoV-19/Japan/NC928-2N/2021 (Omicron/BA.1) | hCoV-19/Japan/NC929-1N/2021 (Omicron/BA.1.1) | hCoV-19/Japan/UT-NCD1288-2N/2022 (Omicron/BA.2) |
| <b>Neutralization activity of monoclonal antibody — ng/ml†</b> |                                                              |                                                          |                                            |                                        |                                               |                                            |                                              |                                                 |
| LY-CoV016, etesevimab                                          | 18.19 ± 9.10                                                 | 150.38 ± 83.51                                           | >50,000                                    | >50,000                                | 15.37 ± 9.78                                  | >50,000                                    | >50,000                                      | >50,000                                         |
| LY-CoV555, bamlanivimab                                        | 4.69 ± 1.43                                                  | 2.65 ± 1.30                                              | 9554.88 ± 926.53                           | 1601.65 ± 896.02                       | 641.73 ± 324.79                               | >50,000                                    | >50,000                                      | >50,000                                         |
| REGN10987, imdevimab                                           | 3.05 ± 0.93                                                  | 1.87 ± 1.60                                              | 2.17 ± 1.30                                | 1.04 ± 0.68                            | 3.95 ± 1.78                                   | >50,000                                    | >50,000                                      | 68.65 ± 8.84                                    |
| REGN10933, casirivimab                                         | 2.79 ± 1.87                                                  | 2.74 ± 1.84                                              | 757.13 ± 287.91                            | 187.69 ± 128.88                        | 2.89 ± 1.78                                   | 14110.70 ± 1782.13                         | 11998.94 ± 2604.70                           | 1666.19 ± 771.77                                |
| COV2-2196, tixagevimab                                         | 1.92 ± 0.28                                                  | 1.34 ± 0.67                                              | 18.98 ± 1.42                               | 6.56 ± 1.56                            | 4.05 ± 2.60                                   | 1299.94 ± 406.58                           | 880.47 ± 68.08                               | 395.78 ± 62.37                                  |
| COV2-2130, cilgavimab                                          | 7.70 ± 2.20                                                  | 3.60 ± 1.62                                              | 10.03 ± 3.05                               | 4.00 ± 2.70                            | 12.76 ± 2.93                                  | 443.87 ± 167.96                            | 13558.20 ± 4646.95                           | 4.44 ± 2.72                                     |
| S309, sotrovimab precursor                                     | 27.33 ± 3.24                                                 | 44.91 ± 22.76                                            | 100.98 ± 22.27                             | 28.38 ± 1.86                           | 111.43 ± 58.22                                | 373.47 ± 159.49                            | 384.52 ± 65.98                               | 1359.05 ± 269.23                                |
| LY-CoV016 plus LY-CoV555                                       | 12.60 ± 1.91                                                 | 15.26 ± 3.98                                             | >10,000                                    | 2545.04 ± 625.72                       | 10.28 ± 3.33                                  | >10,000                                    | >10,000                                      | >10,000                                         |
| REGN10987 plus REGN10933                                       | 3.53 ± 0.66                                                  | 1.55 ± 0.78                                              | 5.18 ± 1.45                                | 2.11 ± 0.48                            | 1.91 ± 0.79                                   | >10,000                                    | >10,000                                      | 222.59 ± 64.47                                  |
| COV2-2196 plus COV2-2130                                       | 3.42 ± 0.92                                                  | 1.94 ± 0.34                                              | 10.30 ± 1.17                               | 1.79 ± 0.87                            | 5.50 ± 2.75                                   | 255.86 ± 45.31                             | 1374.90 ± 14.47                              | 14.48 ± 2.04                                    |
| <b>Viral susceptibility to drug — μM‡</b>                      |                                                              |                                                          |                                            |                                        |                                               |                                            |                                              |                                                 |
| GS-441524§                                                     | 1.04 ± 0.32                                                  | 0.83 ± 0.19                                              | 0.63 ± 0.20                                | 0.91 ± 0.33                            | 1.12 ± 0.20                                   | 1.28 ± 0.42                                | 1.63 ± 0.30                                  | 2.85 ± 0.31                                     |
| EIDD-1931¶                                                     | 0.51 ± 0.14                                                  | 0.95 ± 0.17                                              | 0.60 ± 0.21                                | 0.41 ± 0.13                            | 0.83 ± 0.41                                   | 0.43 ± 0.08                                | 1.09 ± 0.13                                  | 0.67 ± 0.22                                     |
| PF-07321332                                                    | 3.59 ± 0.96                                                  | 4.23 ± 1.04                                              | 2.03 ± 0.96                                | 4.57 ± 1.14                            | 3.90 ± 0.50                                   | 4.26 ± 0.36                                | 3.63 ± 0.42                                  | 6.76 ± 0.69                                     |

\*The monoclonal antibody neutralization activity data and viral drug susceptibility were obtained as part of this study (all data with Omicron/BA.2 and with PF-07321332, shaded green) and previous studies (references 2 and 3). The antibodies used in this work were produced in the authors' laboratory and are not identical to the commercially available products. Plus-minus values are means ± SD. The viral variants of SARS-CoV-2 are listed according to the World Health Organization labels for the Pango lineage.

†The individual monoclonal antibodies were tested at a starting concentration of 50,000 ng per milliliter as a 50% focus reduction neutralization titer. The monoclonal antibody combinations were tested at a starting concentration of 10,000 ng per milliliter for each antibody.

‡The value presented is the 50% inhibitory concentration of the mean micromole value of triplicate reactions.

§GS-441524 is the main metabolite of remdesivir, an RNA-dependent RNA polymerase inhibitor.

¶EIDD-1931 is the active form of molnupiravir, an RNA-dependent RNA polymerase inhibitor.

||PF-07321332, nirmatrelvir, a protease inhibitor.

## Supplementary References

1. Matsuyama S, Nao N, Shirato K, et al. Enhanced isolation of SARS-CoV-2 by TMPRSS2-expressing cells. *Proc Natl Acad Sci U S A* 2020;17:7001-7003.
2. Takashita E, Kinoshita N, Yamayoshi S, et al. Efficacy of Antibodies and Antiviral Drugs against Covid-19 Omicron Variant. *N Engl J Med* 2022 January 26 (Epub ahead of print).
3. Uraki R, Kiso M, Imai M, et al. Therapeutic efficacy of antibodies and antivirals against SARS-CoV-2 Omicron variants, 18 January 2022, PREPRINT (Version 3) available at Research Square [<https://doi.org/10.21203/rs.3.rs-1240227/v1>]
4. Quick J. nCoV-2019 sequencing protocol. ([https://www.protocols.io/view/ncov-2019-sequencing-protocol-v3-locost-bh42j8ye?version\\_warning=no](https://www.protocols.io/view/ncov-2019-sequencing-protocol-v3-locost-bh42j8ye?version_warning=no))
5. Itokawa K, Sekizuka T, Hashino M, et al. Disentangling primer interactions improves SARS-CoV-2 genome sequencing by multiplex tiling PCR. *PLoS One* 2020; 15(9):e0239403.
6. Itokawa K, Sekizuka T, Hashino M, et al. nCoV-2019 sequencing protocol for illumina V.5 ([https://www.protocols.io/view/ncov-2019-sequencing-protocol-for-illumina-b2msqc6e?version\\_warning=no](https://www.protocols.io/view/ncov-2019-sequencing-protocol-for-illumina-b2msqc6e?version_warning=no))
7. Bogner P, Capua I, Lipman DJ, et al. A global initiative on sharing avian flu data. *Nature* 2006;442(7106):981.
8. Vanderheiden A, Edara VV, Floyd K, et al. Development of a Rapid Focus Reduction Neutralization Test Assay for Measuring SARS-CoV-2 Neutralizing Antibodies. *Current Protocols in Immunology*. 2020;131:e116.
9. Takashita E, Morita H, Ogawa R, et al. Susceptibility of Influenza Viruses to the Novel Cap-Dependent Endonuclease Inhibitor Baloxavir Marboxil. *Frontiers in microbiology*. 2018;9:3026.
